# Supplementary material for: Cobalt phosphate nanorod bundles for efficient supercapacitor and oxygen evolution reaction applications and their temperature dependence
Source: Royal Society of Chemistry journal article supplement (doi:10.1039/d4nj03712j), 2024-01-01
Supplement: d4nj03712j1.pdf [file d4nj03712j1.pdf]

## *Supplementary information*

# Cobalt phosphate nanorod bundles for the efficient supercapacitor and oxygen evolution reaction applications and its temperature dependence

Sushama M. Nikam<sup>1</sup>, Suhas H. Sutar<sup>1</sup>, Shubham D. Jituri, Akbar I. Inamdar<sup>2\*</sup>, Sarfraj H. Mujawar<sup>1\*</sup>

<sup>1</sup> Department of Physics, Yashwantrao Chavan Institute of Science, Satara, Maharashtra, 415001, India.

<sup>2</sup> Division of System Semiconductor, College of AI Convergence, Dongguk University, Seoul, 04620, Republic of Korea.

**Keywords:** cobalt phosphate; supercapacitor; electrocatalysis; energy generation and storage; oxygen evolution reaction

**\*Corresponding Author**

E-mail: [sarfrajmujawar695@gmail.com](mailto:sarfrajmujawar695@gmail.com), [akbarphysics2002@gmail.com](mailto:akbarphysics2002@gmail.com)

**Table S1** Mass loading of cobalt oxide and cobalt phosphate on nickel foam.

| Name of Sample                     | Co <sub>150</sub> | Co <sub>250</sub> | Co <sub>350</sub> | Co <sub>450</sub> | Cp <sub>150</sub> | Cp <sub>250</sub> | Cp <sub>350</sub> | Cp <sub>450</sub> |
|------------------------------------|-------------------|-------------------|-------------------|-------------------|-------------------|-------------------|-------------------|-------------------|
| Mass loaded (mg cm <sup>-2</sup> ) | 2.9               | 2.9               | 2.9               | 2.9               | 3.1               | 3.1               | 3.1               | 3.1               |

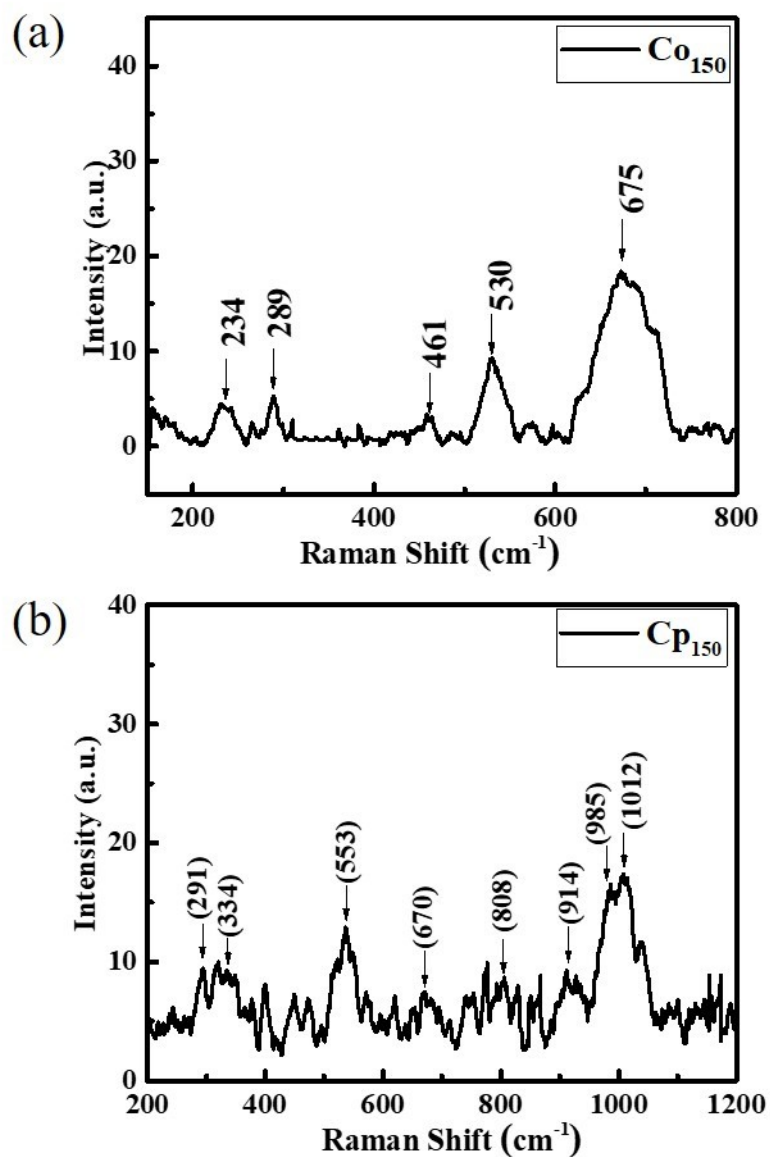

**Figure S1** Raman spectra of the samples (a) Co<sub>150</sub> and (b) Cp<sub>150</sub>

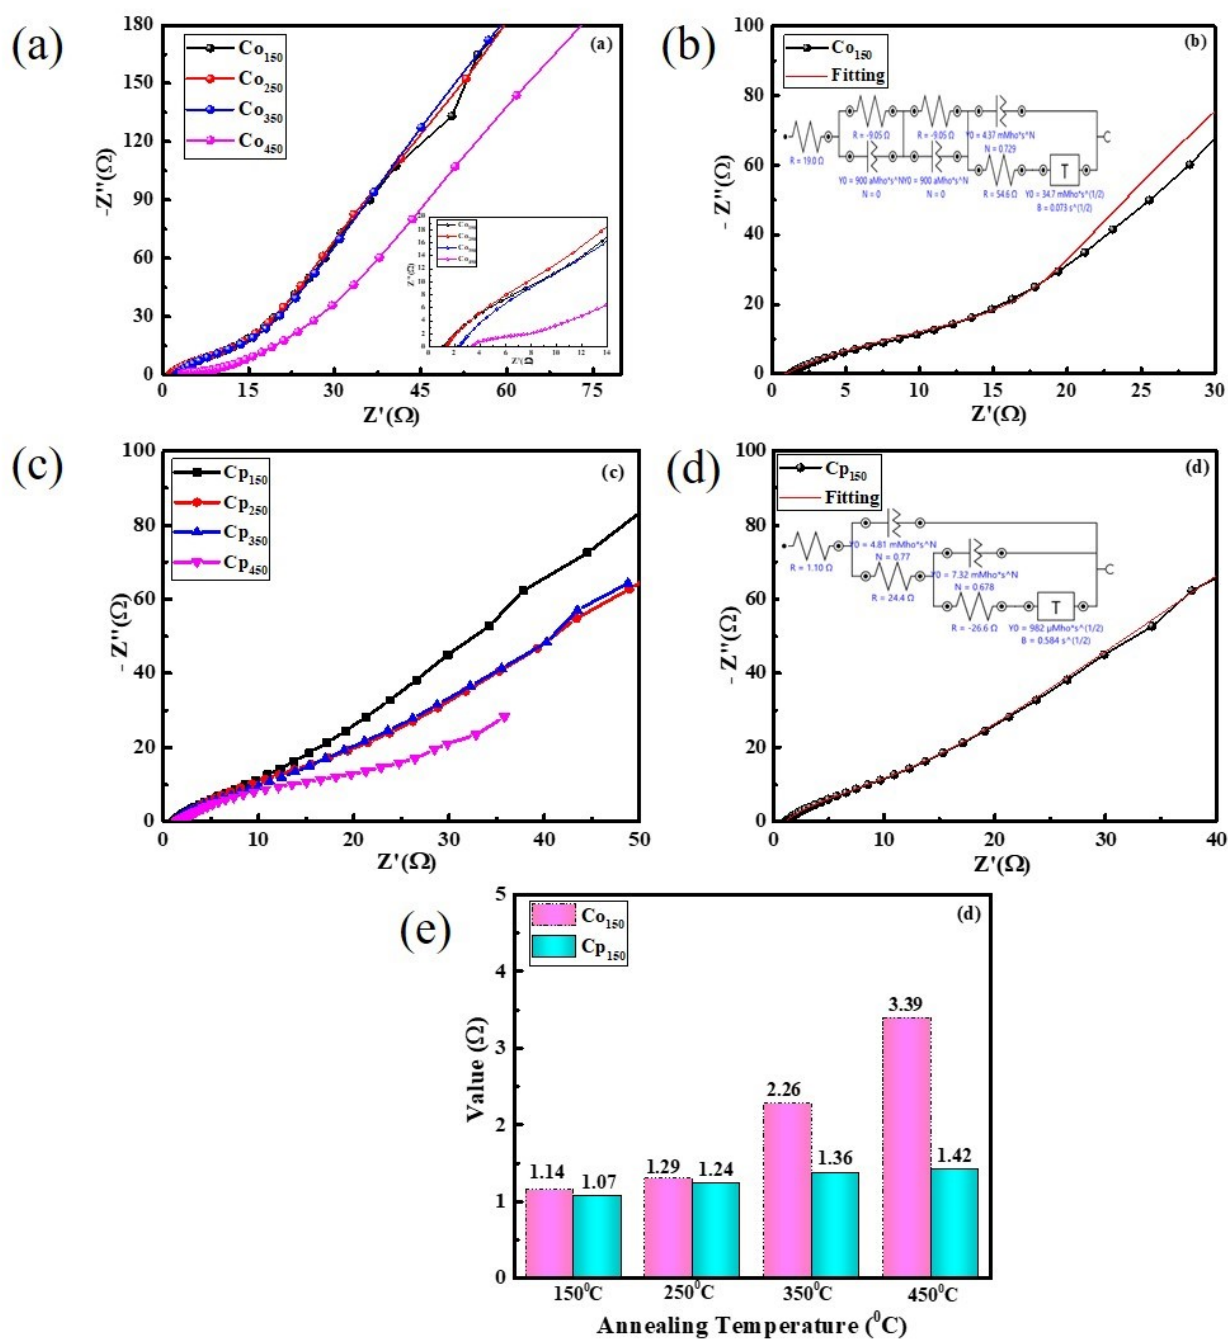

**Figure S2.** (a) EIS plot of Cobalt oxide at different annealing temperatures, (b) electrochemical circuit fitting of  $\text{Co}_{150}$  electrode, (c) EIS plot of cobalt phosphate at different annealing temperatures, (d) electrochemical circuit fitting of  $\text{Cp}_{150}$  electrode, (e) Comparison of resistance values of  $\text{Co}_{150}$  and  $\text{Cp}_{150}$ .

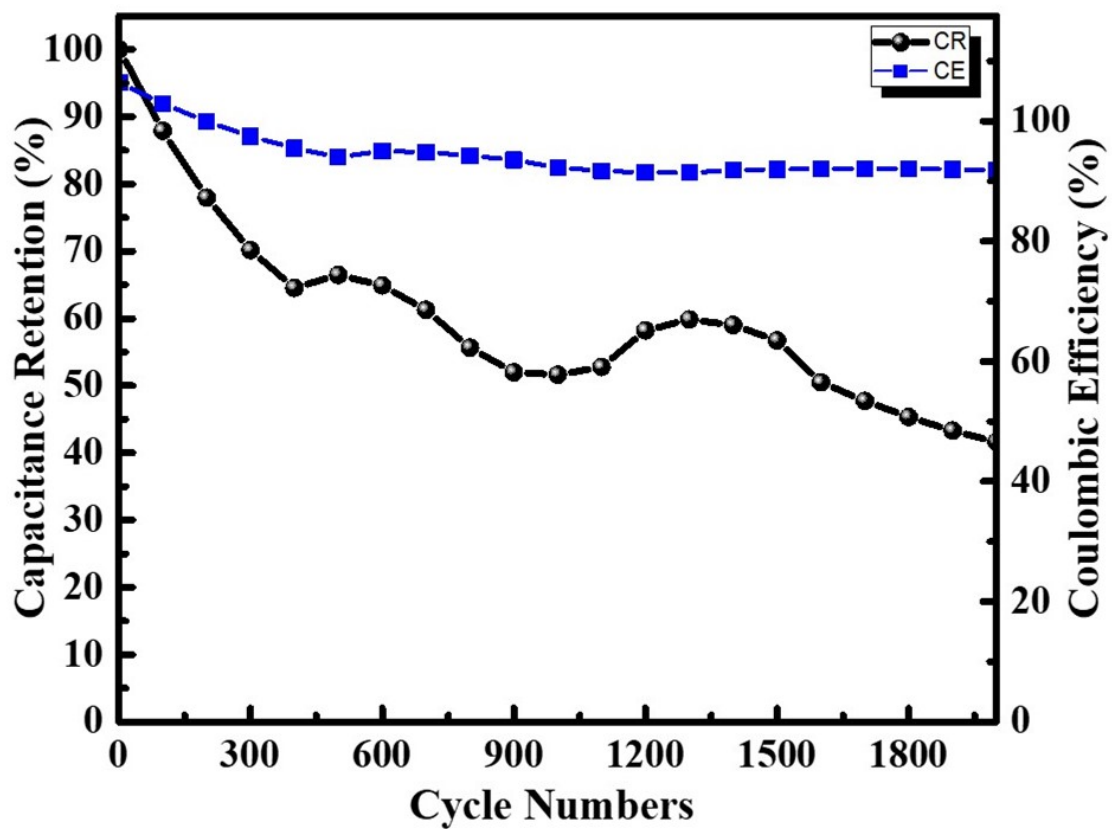

Figure S3. Capacitance retention and Coulombic efficiency for different a number of cycles.

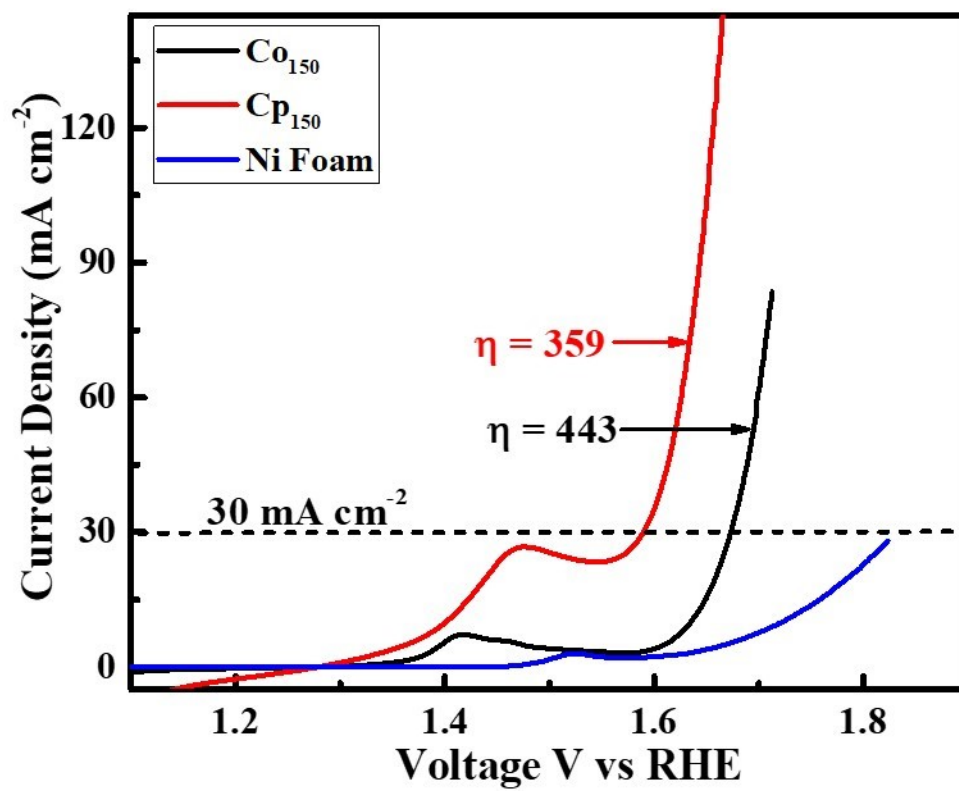

**Figure S4.** Comparative LSV polarisation curve of the Co<sub>60</sub> and Cp<sub>60</sub> electrode and Ni Foam

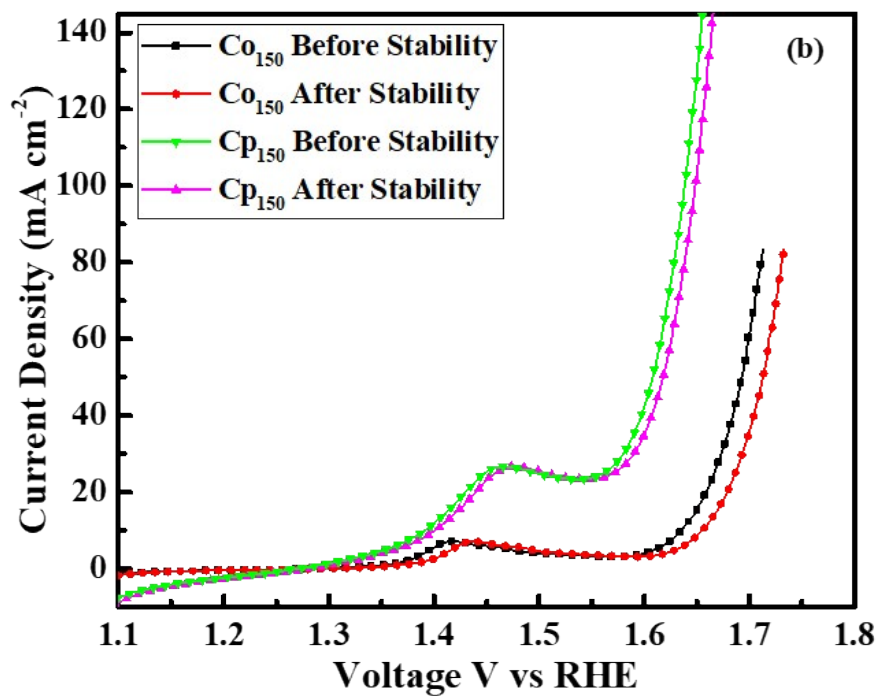

**Figure S5.** LSV curves of the Co<sub>150</sub> and Cp<sub>150</sub> sample in 1 M KOH electrolyte before and after stability measurements.

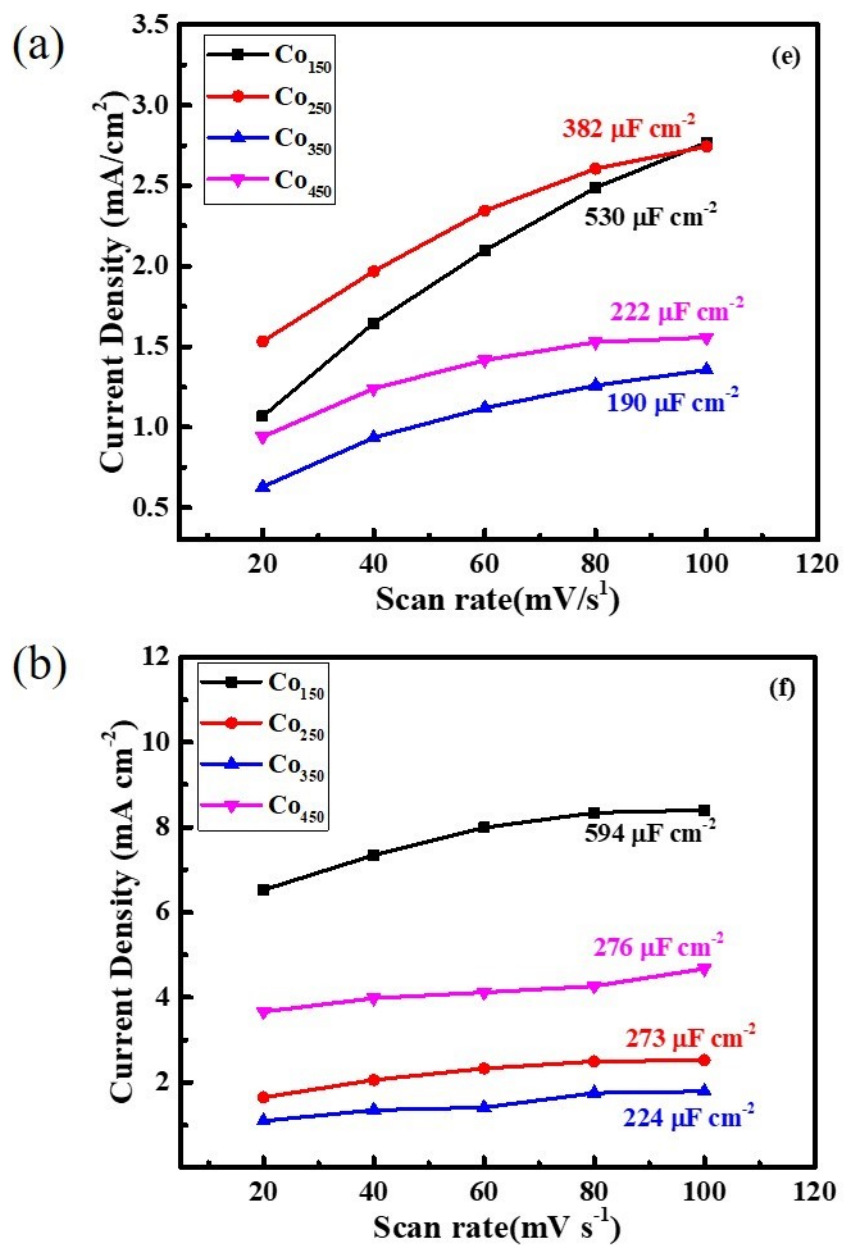

**Figure S6.** (a) and (b) ECSA plot of Cobalt oxide and Cobalt phosphate at different annealing temperatures respectively.

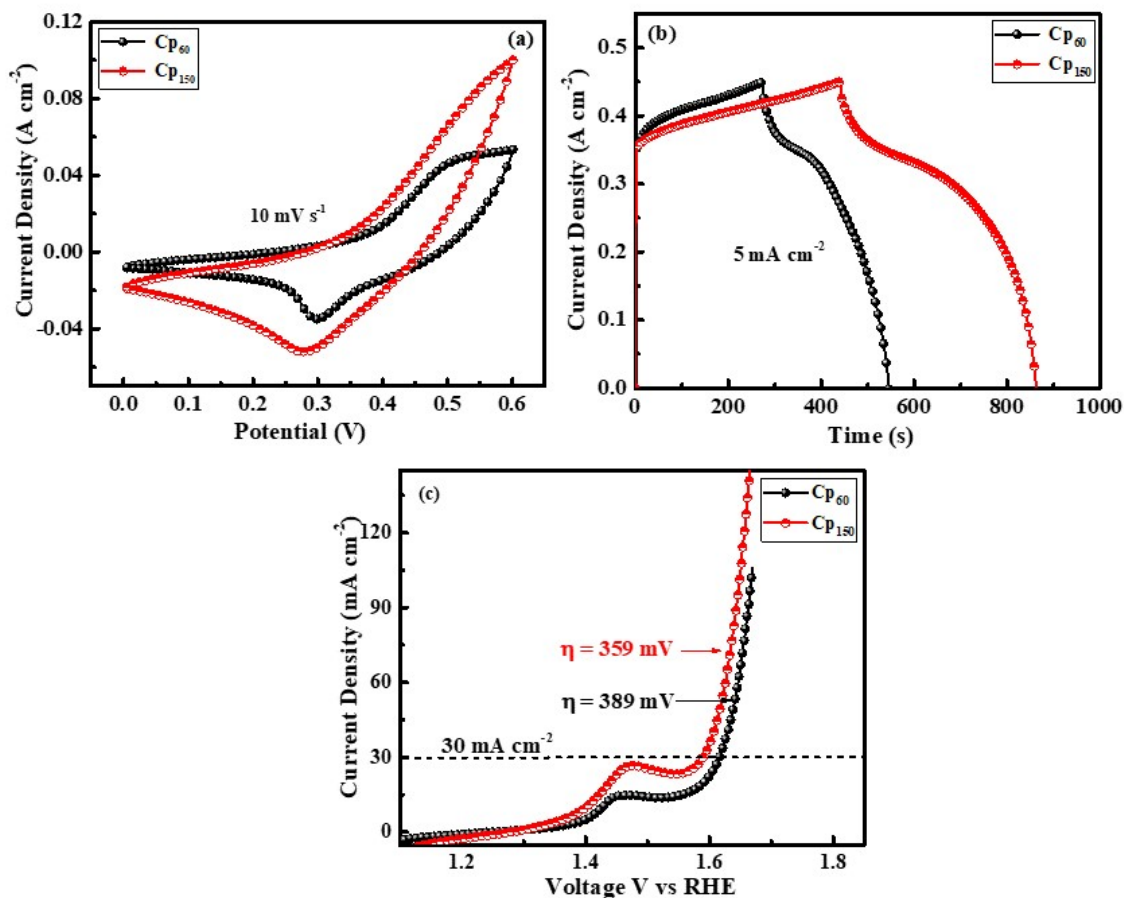

**Figure S7.** (a) CV plot of Cp<sub>60</sub> and Cp<sub>150</sub>; (b) GCD plot of Cp<sub>60</sub> and Cp<sub>150</sub>; and (c) LSV plot of Cp<sub>60</sub> and Cp<sub>150</sub>.

To know the supercapacitor and OER performances of the samples grown at temperature lower than 150°C, we synthesized additional sample at 60°C and compared. The comparative electrochemical performances of these samples are shown in in **Fig. S7**. The CV plot of Cp<sub>60</sub> and Cp<sub>150</sub> is demonstrated in **Fig. S7 (a)**, which depicts that the area under the CV curve of Cp<sub>150</sub> is higher than Cp<sub>60</sub>. The specific capacitance (**Fig. S7 (b)**) of Cp<sub>60</sub> and Cp<sub>150</sub> are found to be 895 Fg<sup>-1</sup> (402 Cg<sup>-1</sup>) and 1512 Fg<sup>-1</sup> (681 Cg<sup>-1</sup>) at 5 mA cm<sup>-2</sup> respectively. Moreover the **Fig. S7 (c)** demonstrates the LSV polarization curve of Cp<sub>60</sub> and Cp<sub>150</sub> with the overpotential of 389 mV for Cp<sub>60</sub> and 359 mV for Cp<sub>150</sub> at 30 mA cm<sup>-2</sup> current density. Hence the electrochemical performance of Cp<sub>150</sub> is more excellent than Cp<sub>60</sub>.
